# Supplementary material for: Self-assembled flower-like ZnCo2O4hierarchical superstructures for high capacity supercapacitors
Source: Royal Society of Chemistry journal article supplement (doi:10.1039/c5ra15272k), 2015-01-01
Supplement: c5ra15272k1.pdf [file c5ra15272k1.pdf]

# **Self-assembled Flower-like $\text{ZnCo}_2\text{O}_4$ Hierarchical Superstructures for High Capacity Supercapacitors**

Satyajit Ratha<sup>a</sup>, and Chandra Sekhar Rout<sup>a\*</sup>

*<sup>a</sup>School of Basic Sciences, Indian Institute of Technology, Bhubaneswar, 751013, Odisha, India.*

*E-mail: csrout@iitbbs.ac.in*

# Supporting Information

## Table of Contents

|      |                                                                                                                     |    |
|------|---------------------------------------------------------------------------------------------------------------------|----|
| I.   | Fig. S1 FESEM images of the sample at different intervals of reaction time                                          | S3 |
| II.  | Fig. S2 Cyclic voltammogram of the sample obtained at sweep rates of 1 mV/s and 2 mV/s, to show its redox activity. | S4 |
| III. | Fig. S3 FESEM image of ZCO after 5000 charge-discharge cycles                                                       | S5 |

**Fig. S1:**

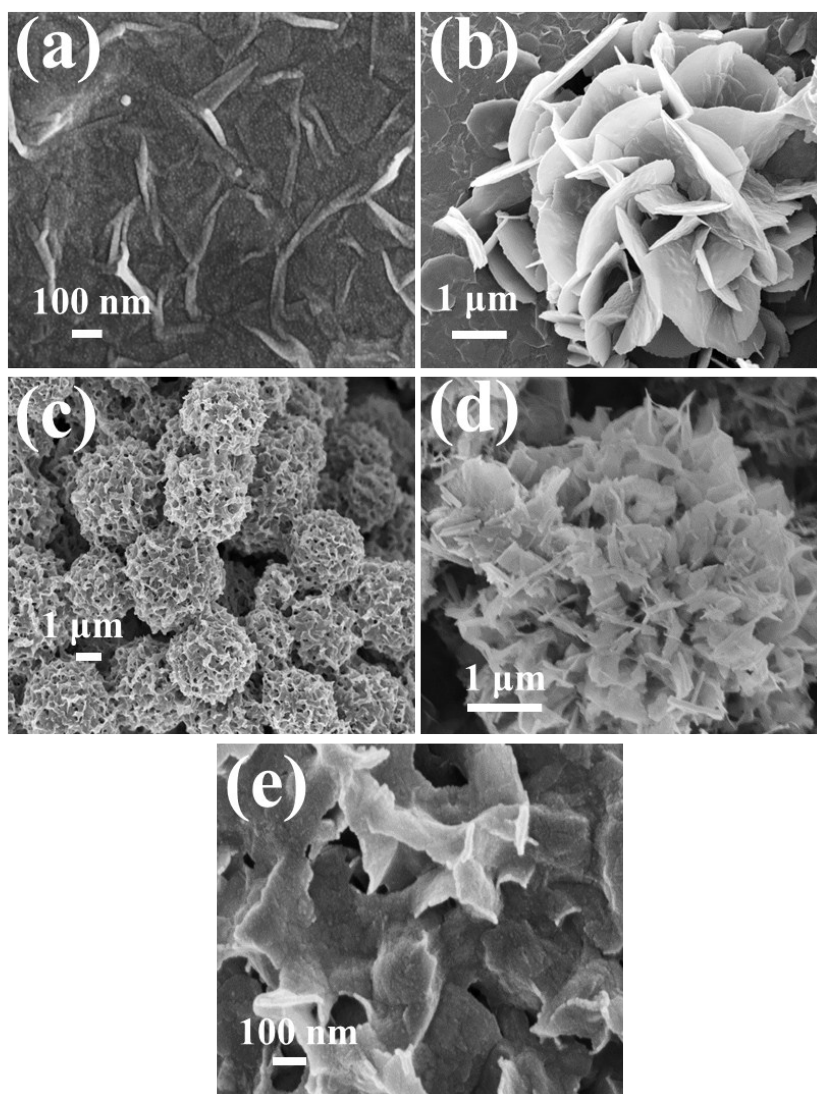

**Figure 1** Morphological study of ZCO at different time steps of reaction using field emission scanning electron microscopy. (a) at 0.5 hr of reaction time, co-precipitation of  $\text{Zn}^{2+}$  and  $\text{Co}^{2+}$  ions occur, initiating the formation of nanosheet phase. (b) at 1 hr of reaction time, oriented aggregation towards nucleation process occurs. After (c) 1.5 hrs and (d) 2 hrs of reaction time, a highly porous flower like structure is formed having numerous nanosheets possessing protruding edges. (e) highly magnified image of the ZCO sample after completion of the reaction time.

Fig. S2:

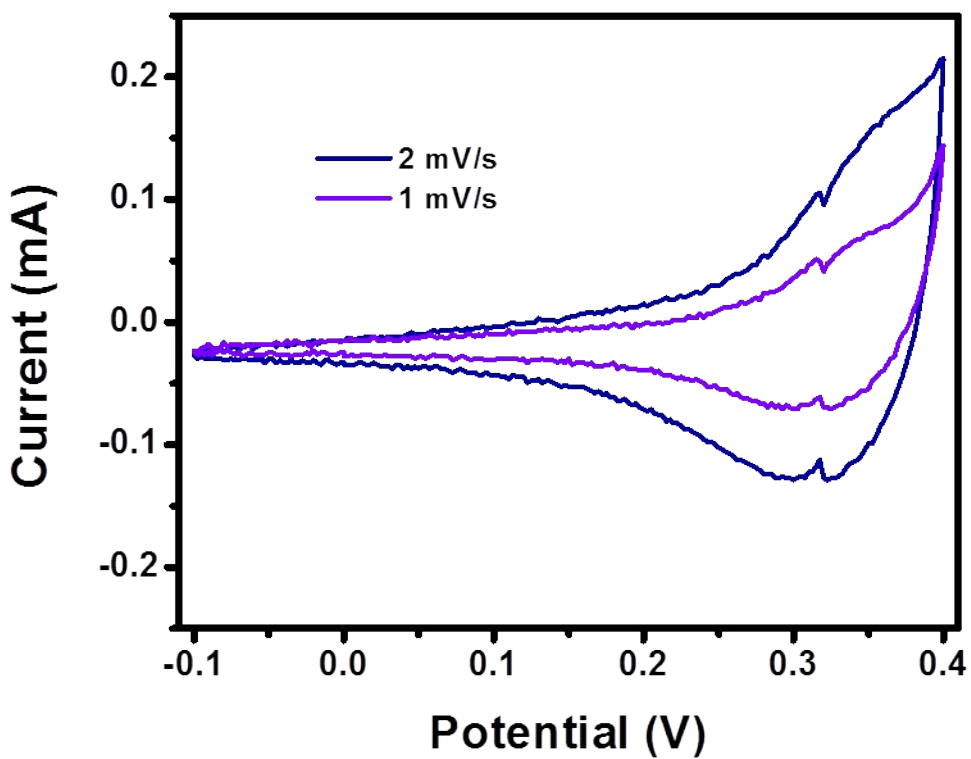

Figure 2 Cyclic voltammetry curves of ZCO at lower scan rates (i.e. 1 mV/s, 2 mV/s ) to show its redox activity. As the scan rate is increased there is a clear shift in the pair of redox peaks.

**Fig. S3:**

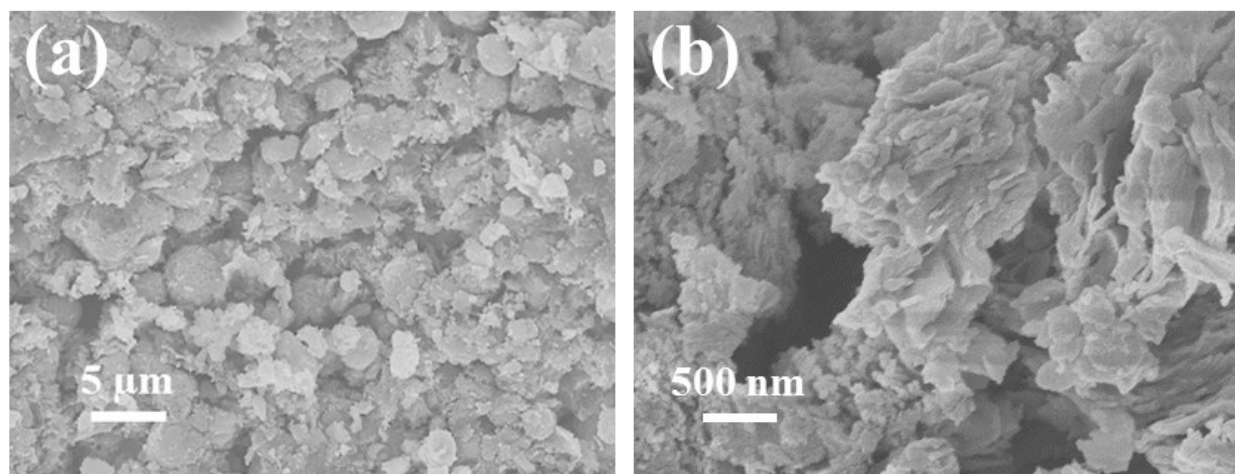

**Fig. S3** FESEM image of ZCO sample at (a) low and (b) high magnification, after the completion of long cyclic stability test (for 5000 cycles).
